# Supplementary material for: Construction of a Bi2MoO6/CoOx/Au system with a dual-channel charge transfer path for enhanced tetracycline degradation
Source: Royal Society of Chemistry journal article supplement (doi:10.1039/d2cy01224c), 2022-01-01
Supplement: d2cy01224c1.pdf [file d2cy01224c1.pdf]

## Supporting Information

### **Construction of Bi<sub>2</sub>MoO<sub>6</sub>/CoO<sub>x</sub>/Au system with dual-channel charge transfer path for enhanced tetracycline degradation**

Tongyu Han<sup>1</sup>, Yigang Chen<sup>2\*</sup>, Haifeng Shi<sup>1,3\*</sup>

<sup>1</sup> School of Science, Jiangnan University, Wuxi, 214122, P. R. China

<sup>2</sup> Department of General Surgery, The Affiliated Wuxi No. 2 People's Hospital of Nanjing Medical University, Wuxi, 214002, P. R. China

<sup>3</sup> National Laboratory of Solid State Microstructures, Nanjing University, Nanjing, 210093, P. R. China

---

\* E-mail addresses: [wuxichen2512@njmu.edu.cn](mailto:wuxichen2512@njmu.edu.cn) (Y. Chen), [hfshi@jiangnan.edu.cn](mailto:hfshi@jiangnan.edu.cn) (H. Shi).

| Photocatalyst                                                       | Concentration (TC, mg/L) | Dosage (g/L) | Time (min) | Removal (%) | Rate (min <sup>-1</sup> ) | Light Source                         | Ref.            |
|---------------------------------------------------------------------|--------------------------|--------------|------------|-------------|---------------------------|--------------------------------------|-----------------|
| CuBi <sub>2</sub> O <sub>4</sub> /Bi <sub>2</sub> MoO <sub>6</sub>  | 20                       | 0.3          | 60         | 72.8        | 0.02142                   | 300W XL<br>(λ ≥ 420 nm)              | [1]             |
| WO <sub>3</sub> /Bi <sub>2</sub> MoO <sub>6</sub>                   | 20                       | 0.6          | 180        | 85.9        | 0.0089                    | 500W XL<br>(λ ≥ 400nm)               | [2]             |
| CuInS <sub>2</sub> /Bi <sub>2</sub> MoO <sub>6</sub>                | 15                       | 0.6          | 120        | 84.7        | 0.015                     | 300W XL<br>(λ ≥ 420 nm)              | [3]             |
| Gd/Pt-Bi <sub>2</sub> MoO <sub>6</sub>                              | 20                       | 1            | 90         | 77.6        | —                         | 400W XL<br>(λ ≥ 420 nm)              | [4]             |
| N-GNDs/Ag/BiVO <sub>4</sub>                                         | 20                       | 0.5          | 80         | 85.4        | 0.02433                   | 300W XL<br>(λ ≥ 420 nm)              | [5]             |
| CDs/g- C <sub>3</sub> N <sub>4</sub> /MoO <sub>3</sub>              | 20                       | 0.6          | 90         | 88.4        | 0.0231                    | 350W XL<br>(λ ≥ 420 nm)              | [6]             |
| Ag/g-C <sub>3</sub> N <sub>4</sub> /Bi <sub>2</sub> WO <sub>6</sub> | 15                       | 0.5          | 60         | 81.4        | 0.02822                   | 300W XL<br>(λ ≥ 420 nm)              | [7]             |
| Bi <sub>2</sub> WO <sub>6</sub> /C@Cu <sub>2</sub> O                | 10                       | 0.4          | 180        | 88          | 0.0105                    | 300W XL<br>(λ ≥ 420 nm)              | [8]             |
| <b>BMO/CoO<sub>x</sub>/1.5Au</b>                                    | <b>10</b>                | <b>0.2</b>   | <b>25</b>  | <b>73.5</b> | <b>0.0607</b>             | <b>300W XL</b><br><b>(λ ≥ 420nm)</b> | <b>Our work</b> |

**Table. S1.** Comparison of pollutant degradation studies with our work.

**Table. S2.** Fitted parameters from time-resolved PL spectra of BMO, BMO/CoO<sub>x</sub>, BMO/1.5Au, and BMO/CoO<sub>x</sub>/1.5Au.

| <b>Samples</b>                   | <b><math>\tau_1</math> (ns)</b> | <b>A<sub>1</sub> (%)</b> | <b><math>\tau_2</math> (ns)</b> | <b>A<sub>2</sub> (%)</b> | <b><math>\tau_{avg}</math> (ns)</b> |
|----------------------------------|---------------------------------|--------------------------|---------------------------------|--------------------------|-------------------------------------|
| <b>BMO</b>                       | 0.41                            | 29.64                    | 1.48                            | 70.36                    | 1.37                                |
| <b>BMO/CoO<sub>x</sub></b>       | 1.47                            | 79.79                    | 4.86                            | 20.21                    | 3.02                                |
| <b>BMO/1.5Au</b>                 | 0.54                            | 35.61                    | 1.83                            | 64.39                    | 1.65                                |
| <b>BMO/CoO<sub>x</sub>/1.5Au</b> | 1.68                            | 36.27                    | 5.63                            | 63.73                    | 5.06                                |

## References

- [1] Shi, W.; Li, M.; Huang, X.; Ren, H.; Guo, F.; Tang, Y.; Lu, C. Construction of  $\text{CuBi}_2\text{O}_4/\text{Bi}_2\text{MoO}_6$  p-n Heterojunction with Nanosheets-on-Microrods Structure for Improved Photocatalytic Activity towards Broad-Spectrum Antibiotics Degradation. *Chem. Eng. J.* 295 (2020) 125009. <https://doi.org/10.1016/j.cej.2020.125009>.
- [2] Han, W.; Wu, T.; Wu, Q. Fabrication of  $\text{WO}_3/\text{Bi}_2\text{MoO}_6$  Heterostructures with Efficient and Highly Selective Photocatalytic Degradation of Tetracycline Hydrochloride. *J. Colloid Interface Sci.* 602 (2021) 544–552. <https://doi.org/10.1016/j.jcis.2021.05.128>.
- [3] Guo, J.; Wang, L.; Wei, X.; Alothman, Z. A.; Albaqami, M. D.; Malgras, V.; Yamauchi, Y.; Kang, Y.; Wang, M.; Guan, W.; Xu, X. Direct Z-Scheme  $\text{CuInS}_2/\text{Bi}_2\text{MoO}_6$  Heterostructure for Enhanced Photocatalytic Degradation of Tetracycline under Visible Light. *J. Hazard. Mater.* 415 (2021) 125591. <https://doi.org/10.1016/j.jhazmat.2021.125591>.
- [4] Li, H.; Li, W.; Wang, F.; Liu, X.; Ren, C.; Miao, X. Fabrication of Pt Nanoparticles Decorated Gd-Doped  $\text{Bi}_2\text{MoO}_6$  Nanosheets: Design, Radicals Regulating and Mechanism of Gd/Pt- $\text{Bi}_2\text{MoO}_6$  Photocatalyst. *Appl. Surf. Sci.* 427 (2018) 1046–1053. <https://doi.org/10.1016/j.apsusc.2017.09.106>.
- [5] Ma, C.; Din, S. T. U.; Seo, W. C.; Lee, J.; Kim, Y.; Jung, H.; Yang, W.  $\text{BiVO}_4$  Ternary Photocatalyst Co-Modified with N-Doped Graphene Nanodots and Ag Nanoparticles for Improved Photocatalytic Oxidation: A Significant Enhancement in Photoinduced Carrier Separation and Broad-Spectrum Light Absorption. *Sep. Purif. Technol.* 264 (2021) 118423. <https://doi.org/10.1016/j.seppur.2021.118423>.
- [6] Xie, Z.; Feng, Y.; Wang, F.; Chen, D.; Zhang, Q.; Zeng, Y.; Lv, W.; Liu, G. Construction of Carbon Dots Modified  $\text{MoO}_3/\text{g-C}_3\text{N}_4$  Z-Scheme Photocatalyst with

Enhanced Visible-Light Photocatalytic Activity for the Degradation of Tetracycline. *Appl. Catal. B Environ.* 229 (2018) 96–104. <https://doi.org/10.1016/j.apcatb.2018.02.011>.

[7] Dou, X.; Li, Q.; Shi, H. Ag Nanoparticle-Decorated 2D/2D S-Scheme g-C<sub>3</sub>N<sub>4</sub>/Bi<sub>2</sub>WO<sub>6</sub> Heterostructures for an Efficient Photocatalytic Degradation of Tetracycline. *CrystEngComm* 23 (26) (2021) 4638–4647. <https://doi.org/10.1039/D1CE00439E>.

[8] Niu, J.; Song, Z.; Gao, X.; Ji, Y.; Zhang, Y. Construction of Bi<sub>2</sub>WO<sub>6</sub> Composites with Carbon-Coated Cu<sub>2</sub>O for Effective Degradation of Tetracycline. *J. Alloys Compd.* 884 (2021) 161292. <https://doi.org/10.1016/j.jallcom.2021.161292>.
